# Supplementary material for: Light-driven water oxidation by a BiVO4/TiO2 photoanode modified with D102 organic dye and copper(ii) meso-tetra(4-carboxyphenyl)porphyrin
Source: Royal Society of Chemistry journal article supplement (doi:10.1039/d4se00543k), 2024-01-01
Supplement: d4se00543k1.pdf [file d4se00543k1.pdf]

SUPPLEMENTARY INFORMATION

**Light-Driven Water Oxidation by  $\text{BiVO}_4/\text{TiO}_2$  Photoanode Modified with D102 Organic Dye and Copper(II) Meso-Tetra(4-Carboxyphenyl)Porphyrin**

Andi Mauliana<sup>a,e</sup>, Muhammad Iqbal Syauqi<sup>b</sup>, Zico Alaia Akbar<sup>a</sup>, Uji Pratomo<sup>c,d</sup>, Jacob Yan Mulyana<sup>\*d</sup>, and Tribidasari A. Ivandini<sup>\*a</sup>

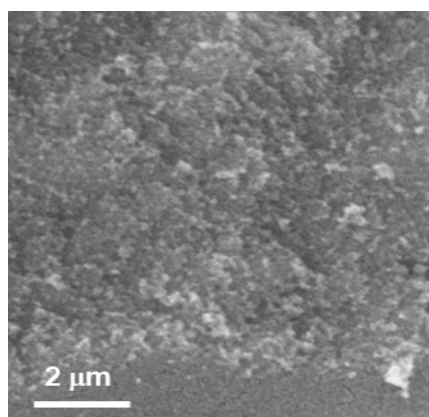

**Fig. S1.** SEM image of  $\text{BiVO}_4/\text{TiO}_2/\text{D102-CuTCPP}$

# SUPPLEMENTARY INFORMATION

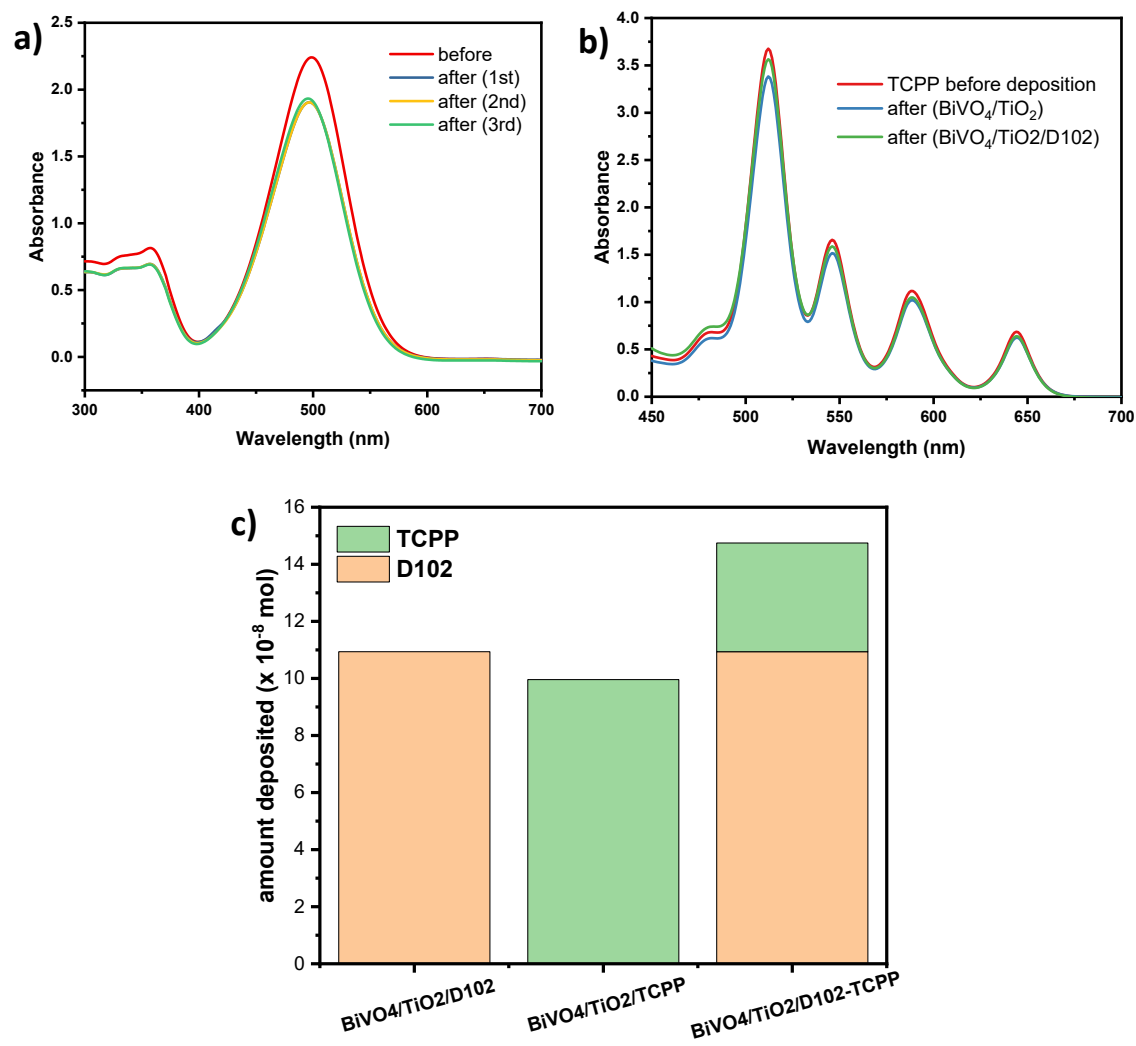

**Fig S2.** Absorption spectra of **a)** D102 solutions and **b)** TCP solutions before and after depositions, together with **(c)** the comparison of their loading amount on 0.81 cm<sup>2</sup> surface in nmol cm<sup>-2</sup>.

## SUPPLEMENTARY INFORMATION

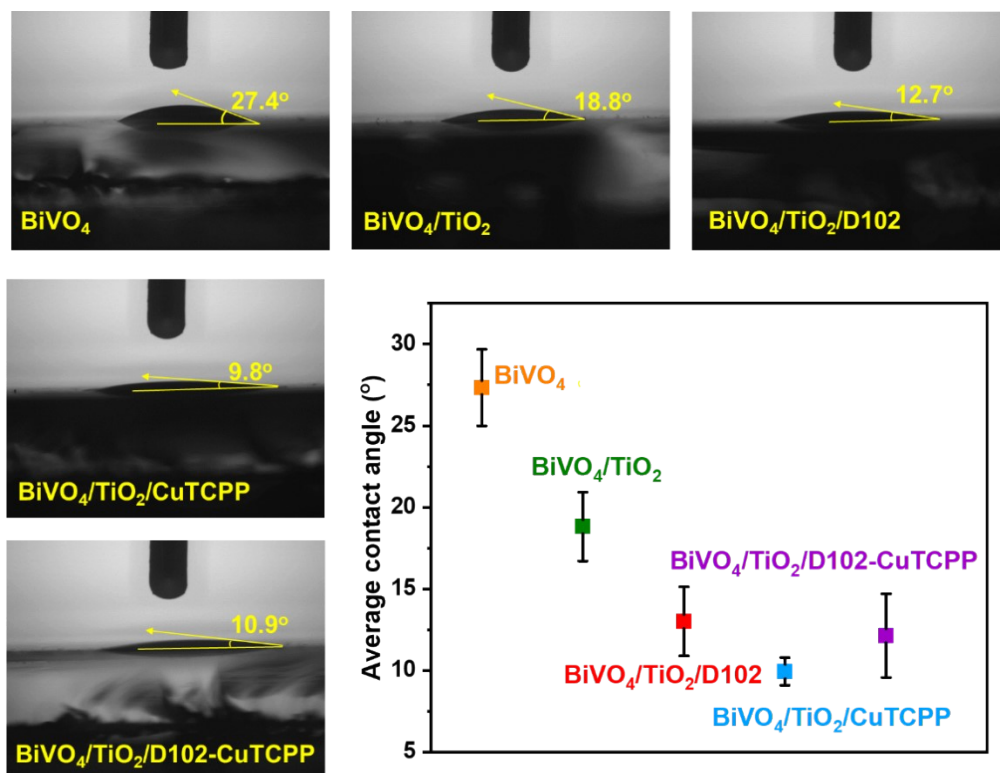

**Fig S3.** Typical images of the contact angle measurements of the synthesized photoanodes with the comparison of average contact angles obtained from five repetitions on different electrode surfaces.

## SUPPLEMENTARY INFORMATION

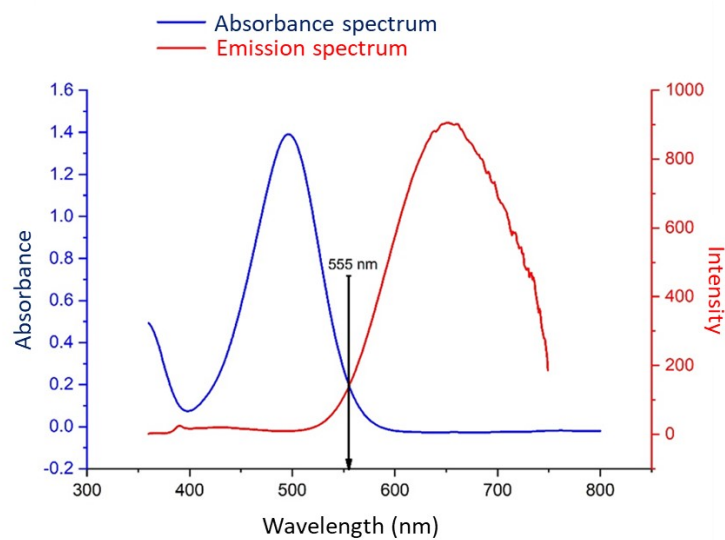

**Fig S4.** Absorption and emission spectra of D102 solution, showing the intersection wavelength of the absorbance curve and the emission curve at 555 nm. This data was used to calculate energy gap of HOMO and LUMO

# SUPPLEMENTARY INFORMATION

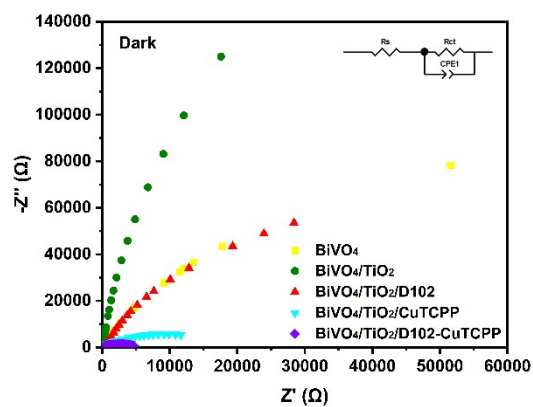

**Fig S5.** Nyquist plot of the synthesized electrodes in dark condition

**Table S1.** Fitting results of Nyquist plots of the synthesized electrodes calculated from Figure S5

| Sample                                           | $R_{ct}$ ( $k\Omega$ ) |       |
|--------------------------------------------------|------------------------|-------|
|                                                  | dark                   | light |
| BiVO <sub>4</sub>                                | 245.9                  | 131.8 |
| BiVO <sub>4</sub> /TiO <sub>2</sub>              | 134.8                  | 86.55 |
| BiVO <sub>4</sub> /TiO <sub>2</sub> /D102        | 185.8                  | 14.5  |
| BiVO <sub>4</sub> /TiO <sub>2</sub> /CuTCPP      | 14.4                   | 11.8  |
| BiVO <sub>4</sub> /TiO <sub>2</sub> /D102-CuTCPP | 5.2                    | 4.4   |

# SUPPLEMENTARY INFORMATION

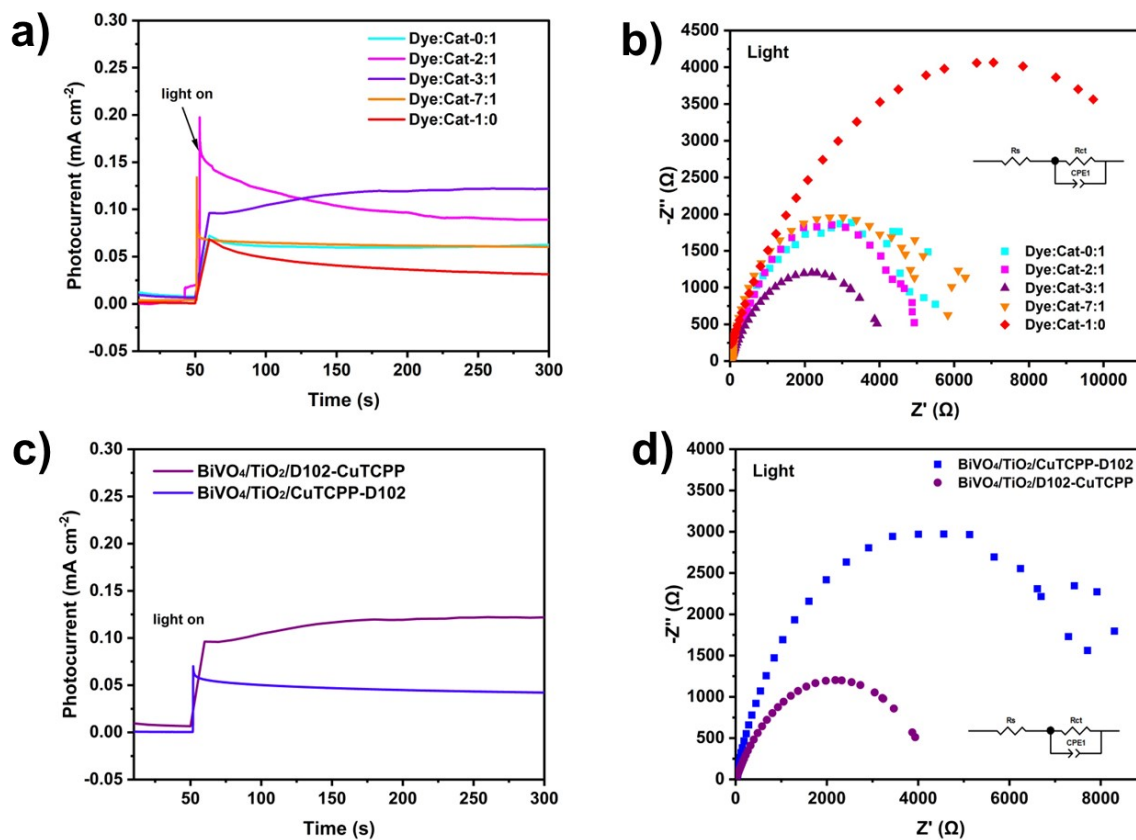

**Fig S6.** Chronoamperograms and Nyquist Plots of  $\text{BiVO}_4/\text{TiO}_2$  electrodes prepared with (a-b) different mol ratios of D102 and CuTCPP, respectively; and (c-d) different dye and co-catalyst deposition order.  $\text{BiVO}_4/\text{TiO}_2/\text{D102-CuTCPP}$  was prepared by immersing  $\text{BiVO}_4/\text{TiO}_2$  electrodes in D102 solution for 3 h followed by in TCPP solution for 24 h, while  $\text{BiVO}_4/\text{TiO}_2/\text{CuTCPP-D102}$  was prepared by immersing  $\text{BiVO}_4/\text{TiO}_2$  electrodes in TCPP solution for 24 h followed by in D102 solution for 3 h.

## SUPPLEMENTARY INFORMATION

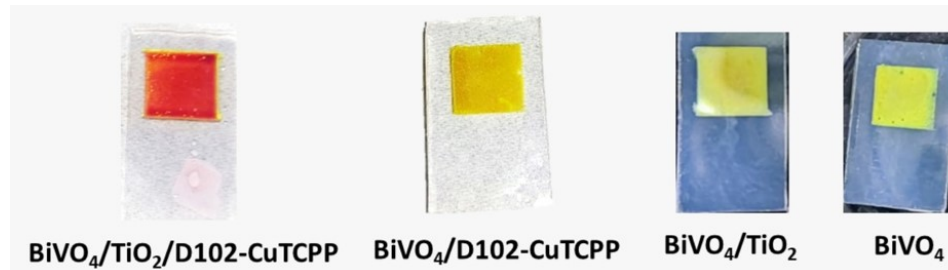

**Fig S7.** The photographs of  $\text{BiVO}_4/\text{TiO}_2/\text{D102-CuTCPP}$ ;  $\text{BiVO}_4/\text{D102-CuTCPP}$ ;  $\text{BiVO}_4/\text{TiO}_2$ ; and  $\text{BiVO}_4$  photoanodes.
